# Supplementary material for: miR-105/93-3p promotes chemoresistance and circulating miR-105/93-3p acts as a diagnostic biomarker for triple negative breast cancer
Source: Springer Nature journal article supplement (doi:10.1186/s13058-017-0918-2), 2017-12-01

# Supplementary Figure 1

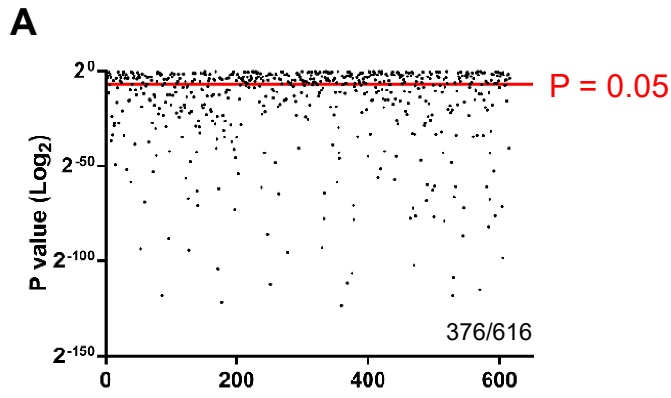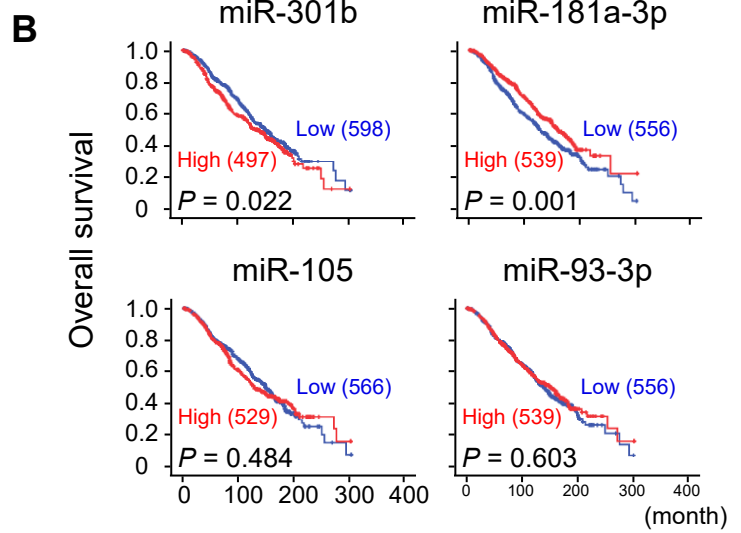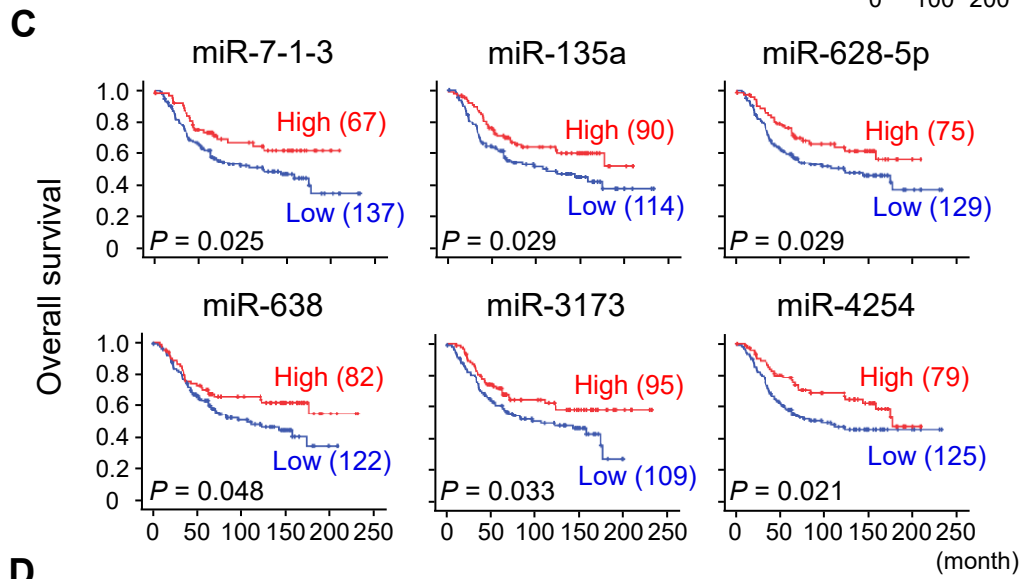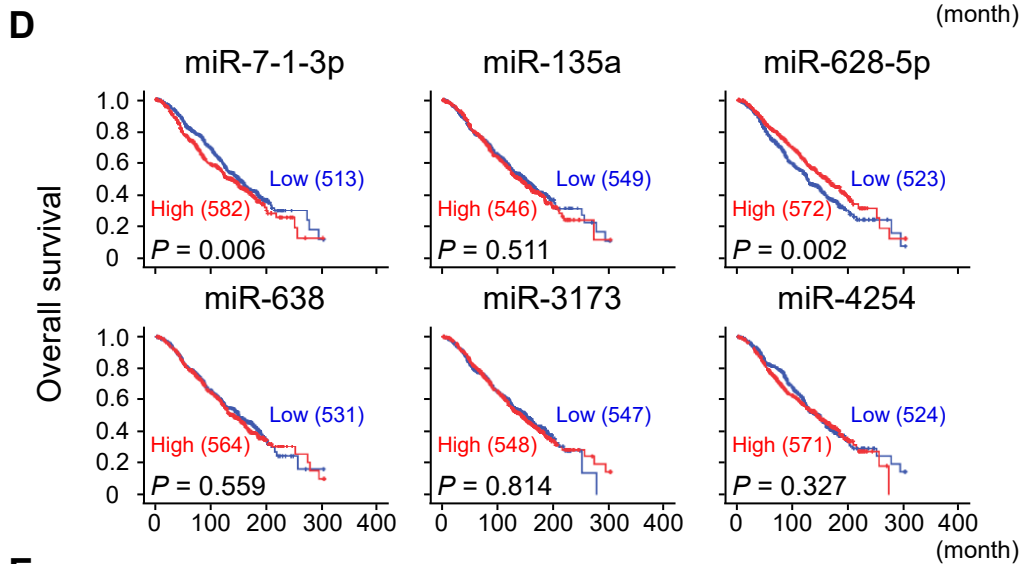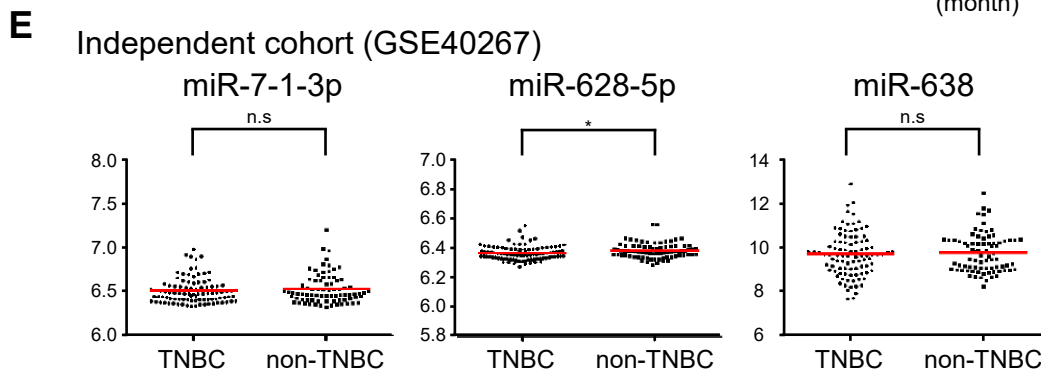

# Supplementary Figure 2

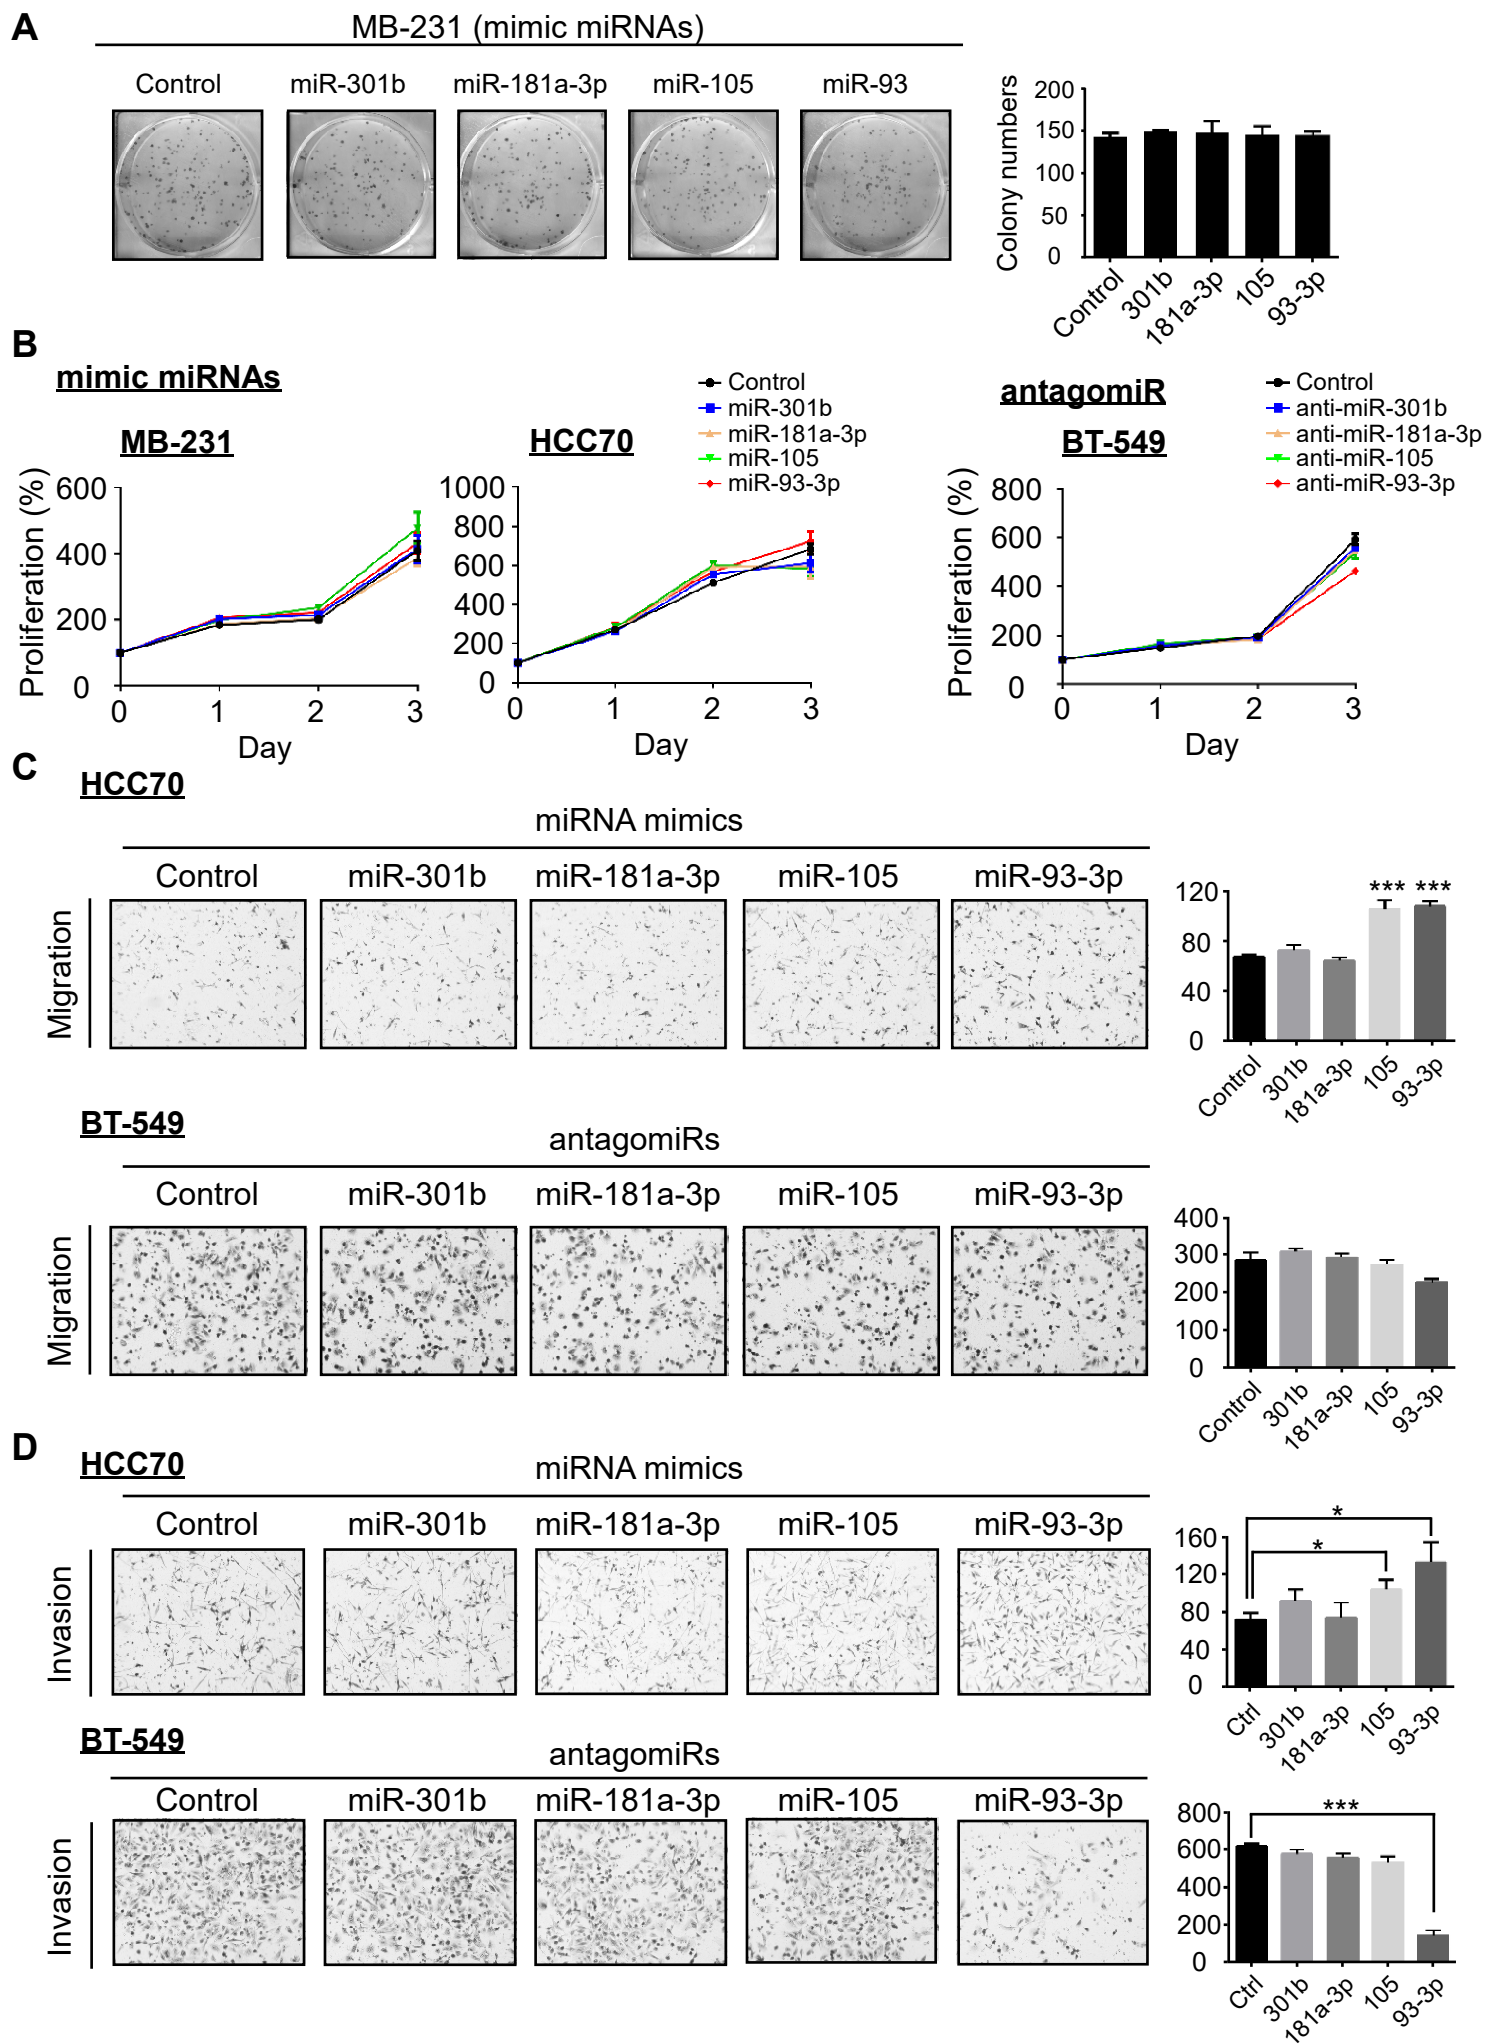

# Supplementary Figure 3

**A**

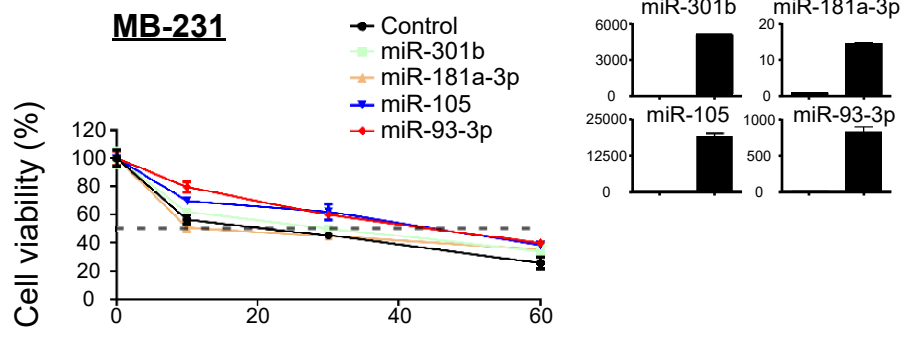

**B**

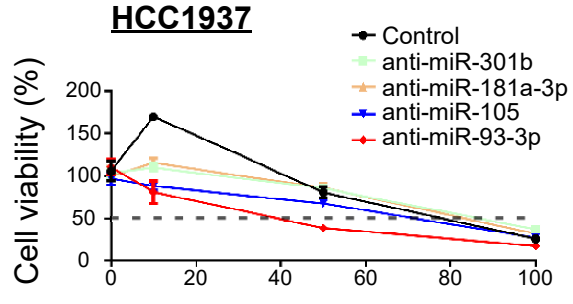

**C**

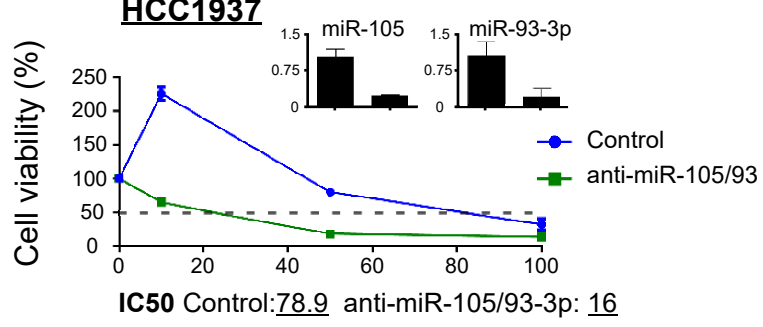

**D**

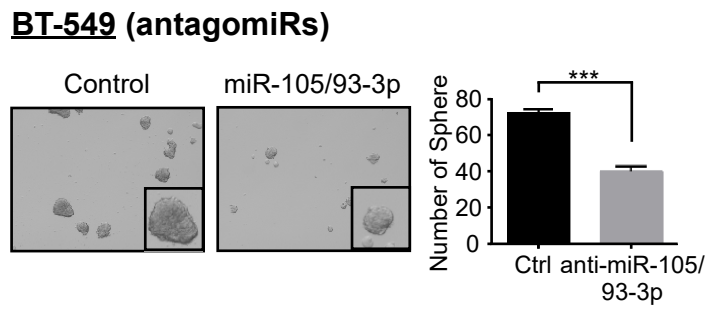

# Supplementary Figure 4

**A**

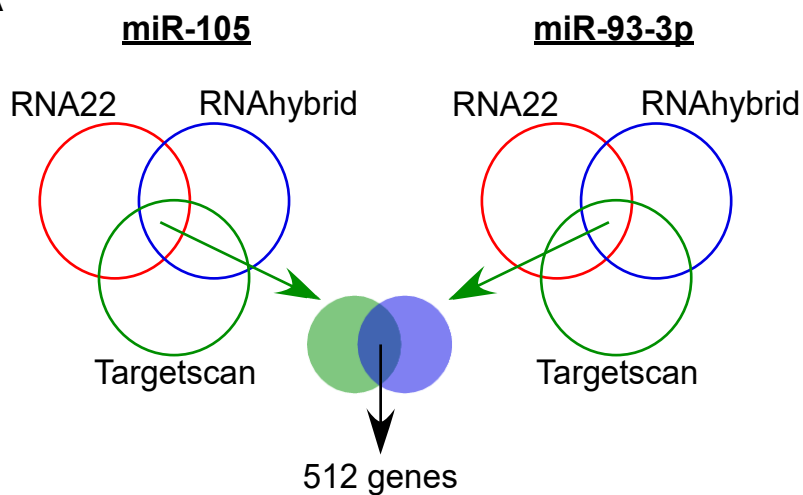

**C**

**MB-231**

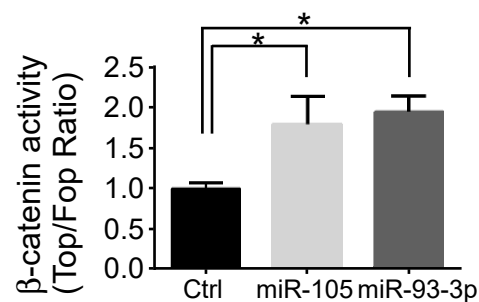

**B**

**miR-105**

**Top Canonical Pathways**

| Name                                                               | p-value  | Overlap     |
|--------------------------------------------------------------------|----------|-------------|
| Bladder Cancer Signaling                                           | 4.83E-04 | 4.6 % 4/87  |
| Colorectal Cancer Metastasis Signaling                             | 5.19E-04 | 2.5 % 6/241 |
| Wnt/-catenin Signaling                                             | 7.32E-04 | 2.9 % 5/170 |
| Xenobiotic Metabolism Signaling                                    | 1.01E-03 | 2.2 % 6/274 |
| Thyroid Hormone Metabolism II (via Conjugation and/or Degradation) | 1.66E-03 | 5.4 % 3/56  |

**miR-93-3p**

**Top Canonical Pathways**

| Name                                          | p-value  | Overlap     |
|-----------------------------------------------|----------|-------------|
| Wnt/-catenin Signaling                        | 6.96E-04 | 2.9 % 5/170 |
| Cell Cycle Control of Chromosomal Replication | 5.52E-03 | 7.4 % 2/27  |
| Agranulocyte Adhesion and Diapedesis          | 7.94E-03 | 2.1 % 4/190 |
| Leukocyte Extravasation Signaling             | 1.01E-02 | 2.0 % 4/204 |
| Protein Ubiquitination Pathway                | 2.24E-02 | 1.5 % 4/259 |

**D**

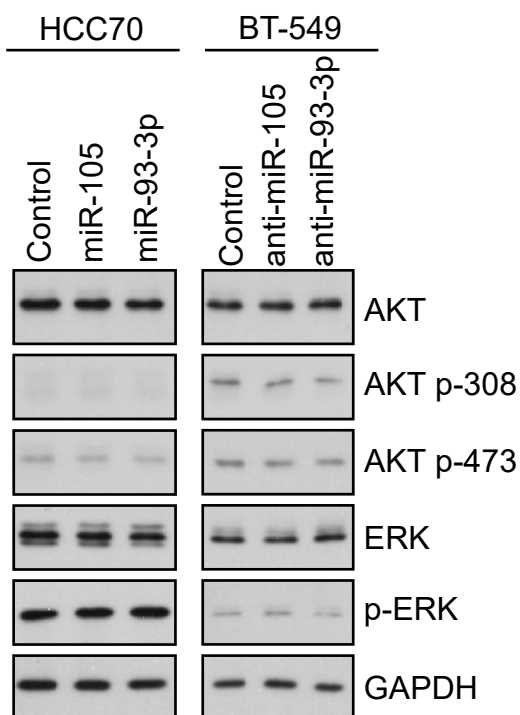



# Supplementary Figure 5

**A**

| Predicted miRNA target genes in Wnt signaling pathway |              |
|-------------------------------------------------------|--------------|
| FZD3                                                  | <b>SFRP1</b> |
| LRP6                                                  | SMAD2        |
| NFATC3                                                | SMAD3        |
| PRKCA                                                 |              |
| PRKX                                                  |              |
| PRICKLE2                                              |              |

**B**

| miR-105      |          | miR-93-3p    |          |
|--------------|----------|--------------|----------|
| Symbol       | Expected | Symbol       | Expected |
| CDH1         |          | CDH3         |          |
| CDH3         |          | MMP7         | Up       |
| FZD8         | Up       | <b>SFRP1</b> | Down     |
| <b>SFRP1</b> | Down     | SOX10        | Down     |
| WIF1         | Down     | UBD          |          |

**C**

**miR-105 free energy= -27.2 kcal/mol**  
 Position 974  
 SFRP1 5' C CCAC UUUUUUUCA AGG UUUUAAAAC UAGAU UGAGCAUUUGA A 3'  
 GGUG UCC UCAG UCAG ACUCGUAAACU 5'  
 miRNA 3' U

**miR-93-3p free energy= -28.5 kcal/mol**  
 Position 323  
 SFRP1 5' G UUGGGCGGAA AG C 3'  
 GGGG AGUG AGC CAGCAG  
 CCCU UCAC UCG GUCGUC  
 miRNA 3' G GA A A 5'

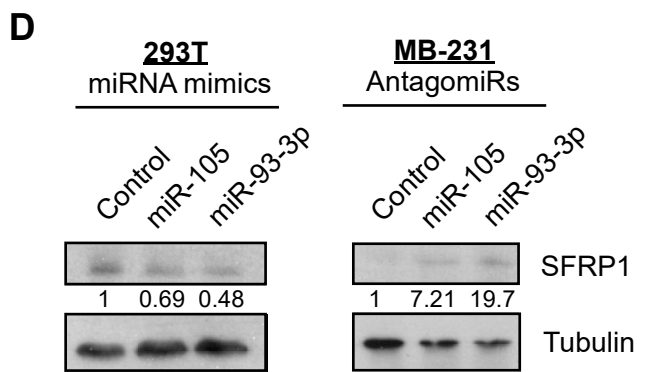

# Supplementary Figure 6

**A**

**Non-TNBC**

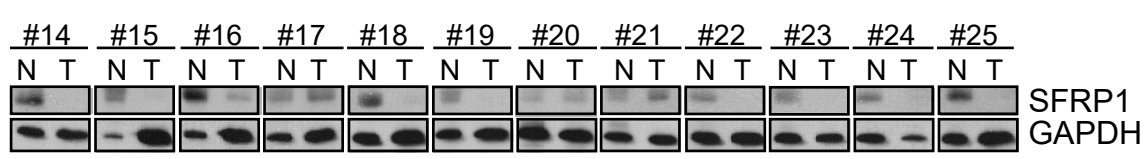

**B**

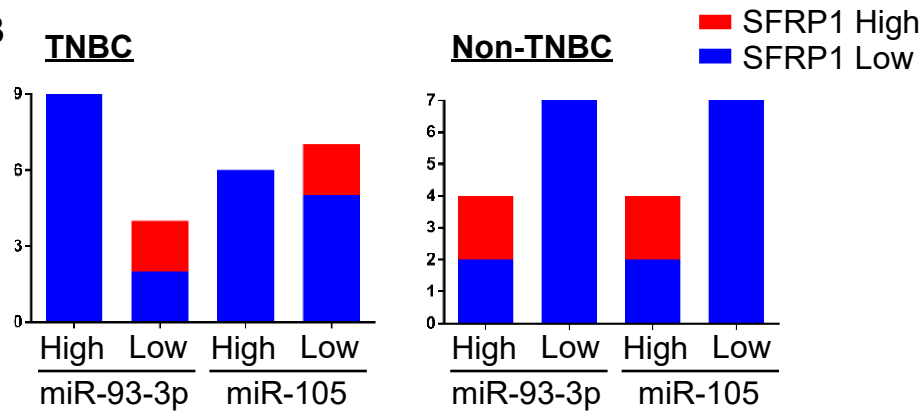

**C**

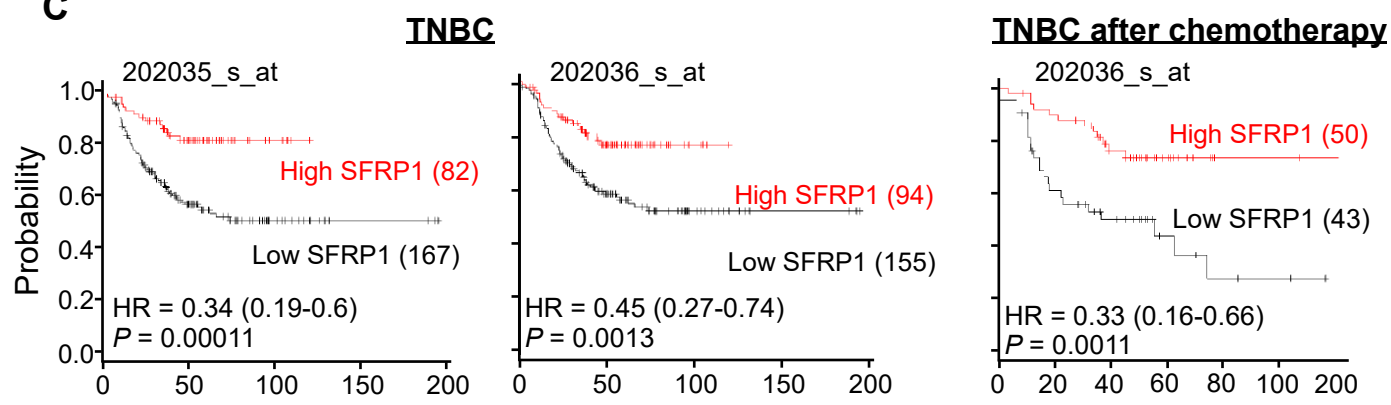

**D**

**TNBC**

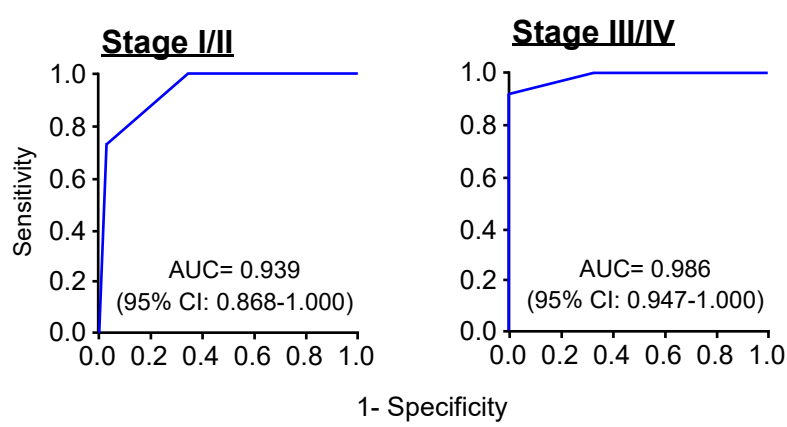

Supplement: MOESM1 [file 15319808]
